# Supplementary material
Source: Springer Nature journal article supplement (https://www.springermedizin.de/resource/supplementary/12888_2012_1342_MOESM2_ESM.pdf/9479912)

**(A)**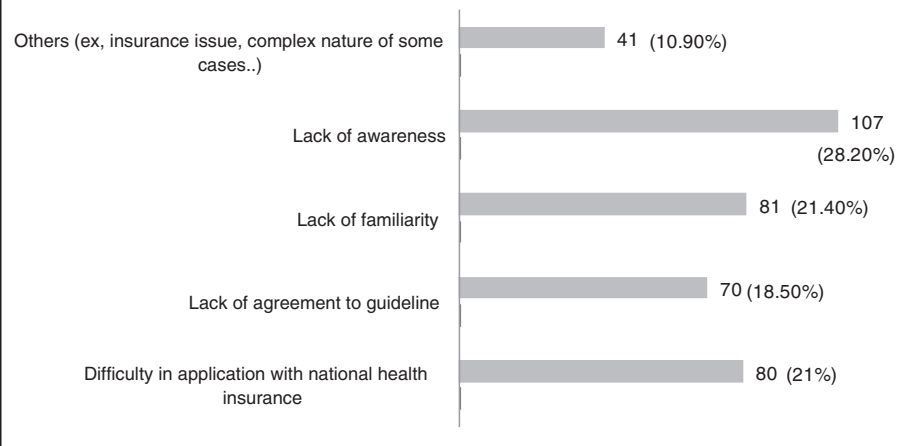**(B)**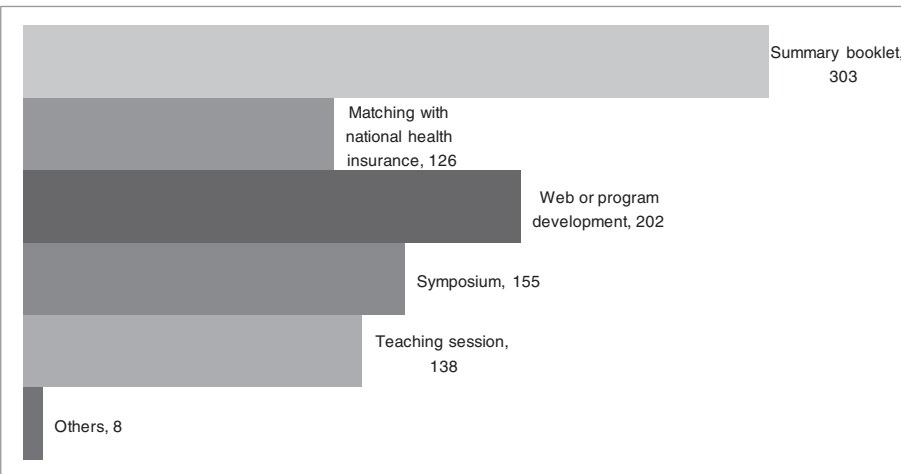

Supplement: MOESM2 [file 9479912]
